# Supplementary material for: Rhizobiales-Specific RirA Represses a Naturally “Synthetic” Foreign Siderophore Gene Cluster To Maintain Sinorhizobium-Legume Mutualism
Source: PubMed Central journal article supplement (PMC8822346; doi:10.1128/mbio.02900-21), 2022-02-08
Supplement: mbio.02900-21-sf001.pdf [file mbio.02900-21-sf001.pdf]

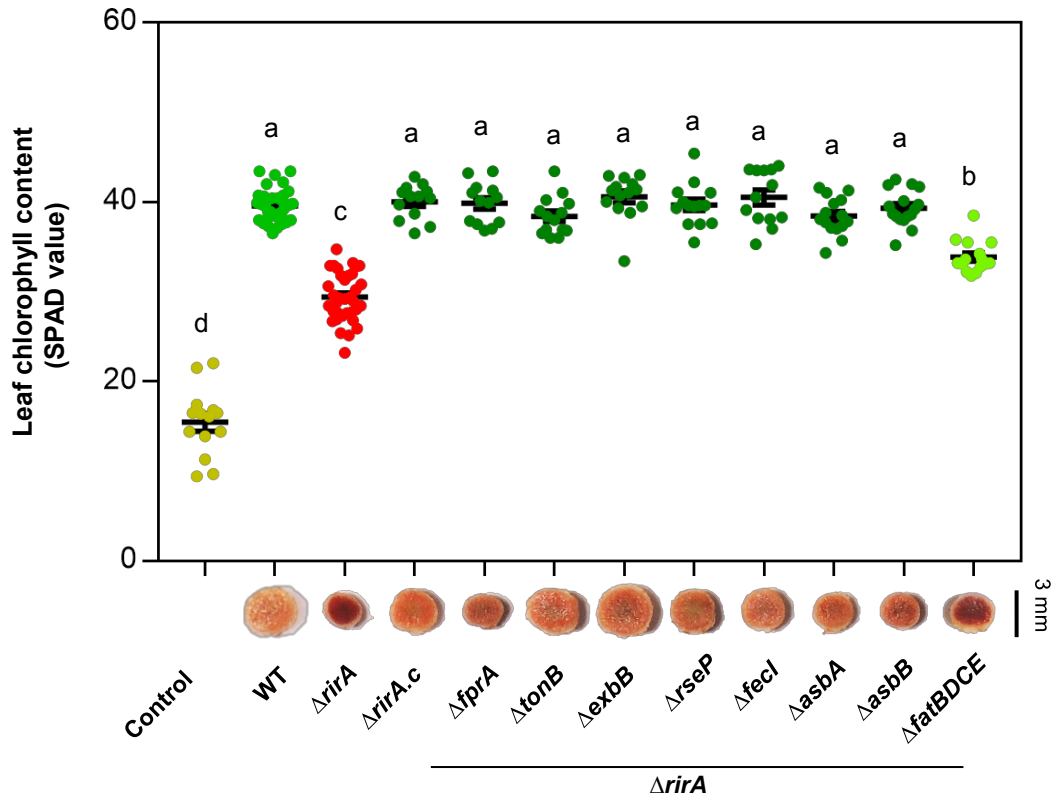

**Figure S1. Symbiotic performance of suppressor mutants on wild soybean plants.** The combined mutants were obtained by in frame deletion of related genes in the  $\Delta rirA$  background as indicated. The *asbB* and *fatBDCE* were also deleted in the  $\Delta rirA$  background for comparison. Representative pictures of vertical section of nodules are shown. Different letters indicate significant difference between means (mean  $\pm$  SE; ANOVA followed by Duncan's test, alpha = 0.05) based on more than thirteen scored plants from three independent experiments. Detailed statistics of symbiotic performance for test strains are shown in Table S5.
