# Supplementary material for: Rhizobiales-Specific RirA Represses a Naturally “Synthetic” Foreign Siderophore Gene Cluster To Maintain Sinorhizobium-Legume Mutualism
Source: PubMed Central journal article supplement (PMC8822346; doi:10.1128/mbio.02900-21), 2022-02-08
Supplement: mbio.02900-21-sf003.pdf [file mbio.02900-21-sf003.pdf]

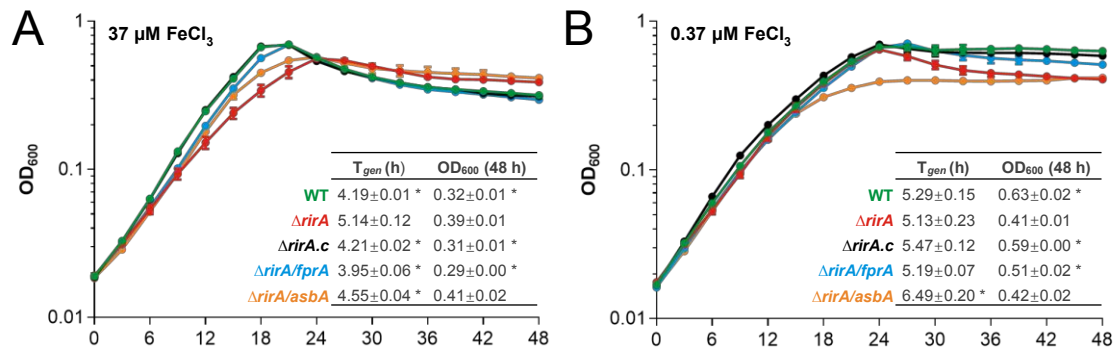

**Figure S3. Growth curves and generation time ( $T_{\text{gen}}$ ) for test strains.** (A) the iron replete condition ( $37 \mu\text{M}$   $\text{FeCl}_3$ ) and (B) the iron deficient condition ( $0.37 \mu\text{M}$   $\text{FeCl}_3$ ) were used. Significant difference compared to the  $\Delta\text{rirA}$  mutant is indicated ( $t$  test, \*, P-value < 0.05; mean  $\pm$  SE based on three biological replicates).
