# Supplementary material for: Rhizobiales-Specific RirA Represses a Naturally “Synthetic” Foreign Siderophore Gene Cluster To Maintain Sinorhizobium-Legume Mutualism
Source: PubMed Central journal article supplement (PMC8822346; doi:10.1128/mbio.02900-21), 2022-02-08
Supplement: mbio.02900-21-sf004.pdf [file mbio.02900-21-sf004.pdf]

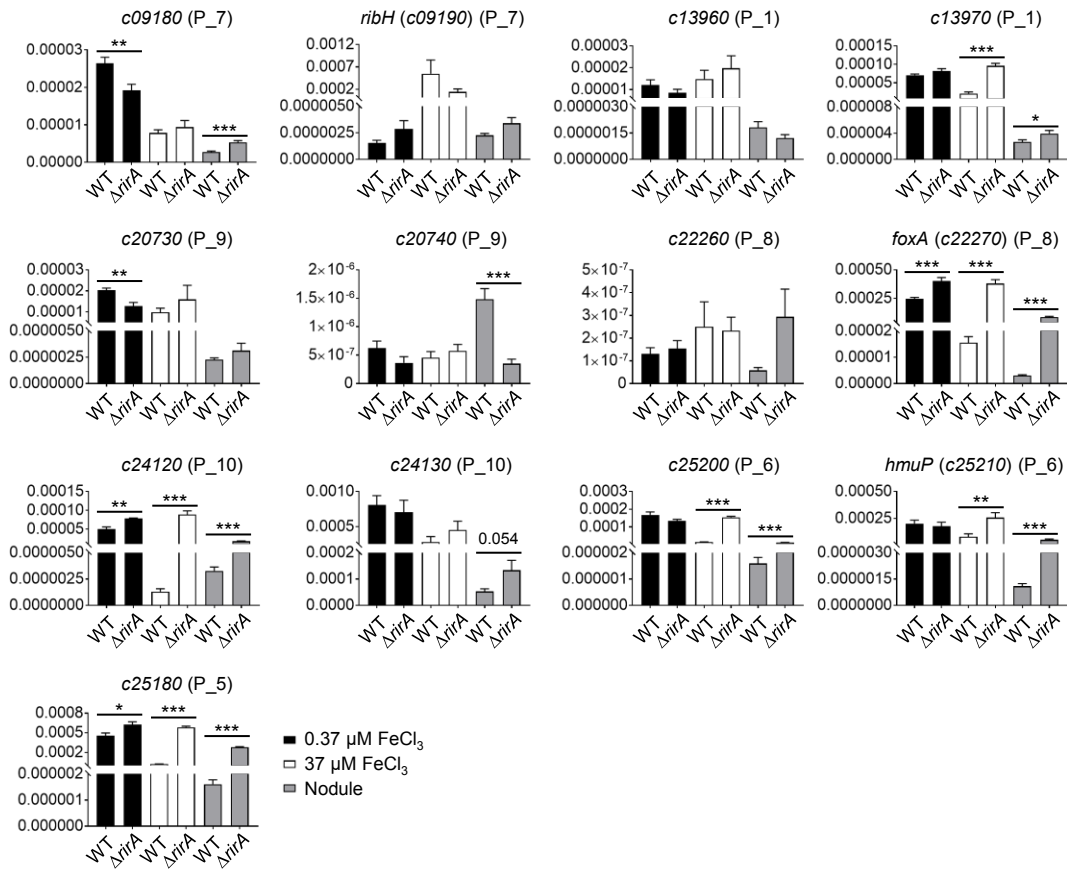

**Figure S4. RT-qPCR analyses of RirA targets.** Free-living cultures under iron replete (37  $\mu\text{M}$   $\text{FeCl}_3$ ) or deficient (0.37  $\mu\text{M}$   $\text{FeCl}_3$ ) conditions, and rhizobia within soybean nodules (28 dpi). The transcription level relative to 16S rRNA gene is shown. Significant differences are indicated (mean  $\pm$  SE based on three independent experiments; *t* test, \*, P-value < 0.05; \*\*, P-value < 0.01; \*\*\*, P-value < 0.001).
