# Supplementary material for: Rhizobiales-Specific RirA Represses a Naturally “Synthetic” Foreign Siderophore Gene Cluster To Maintain Sinorhizobium-Legume Mutualism
Source: PubMed Central journal article supplement (PMC8822346; doi:10.1128/mbio.02900-21), 2022-02-08
Supplement: mbio.02900-21-sf005.pdf [file mbio.02900-21-sf005.pdf]

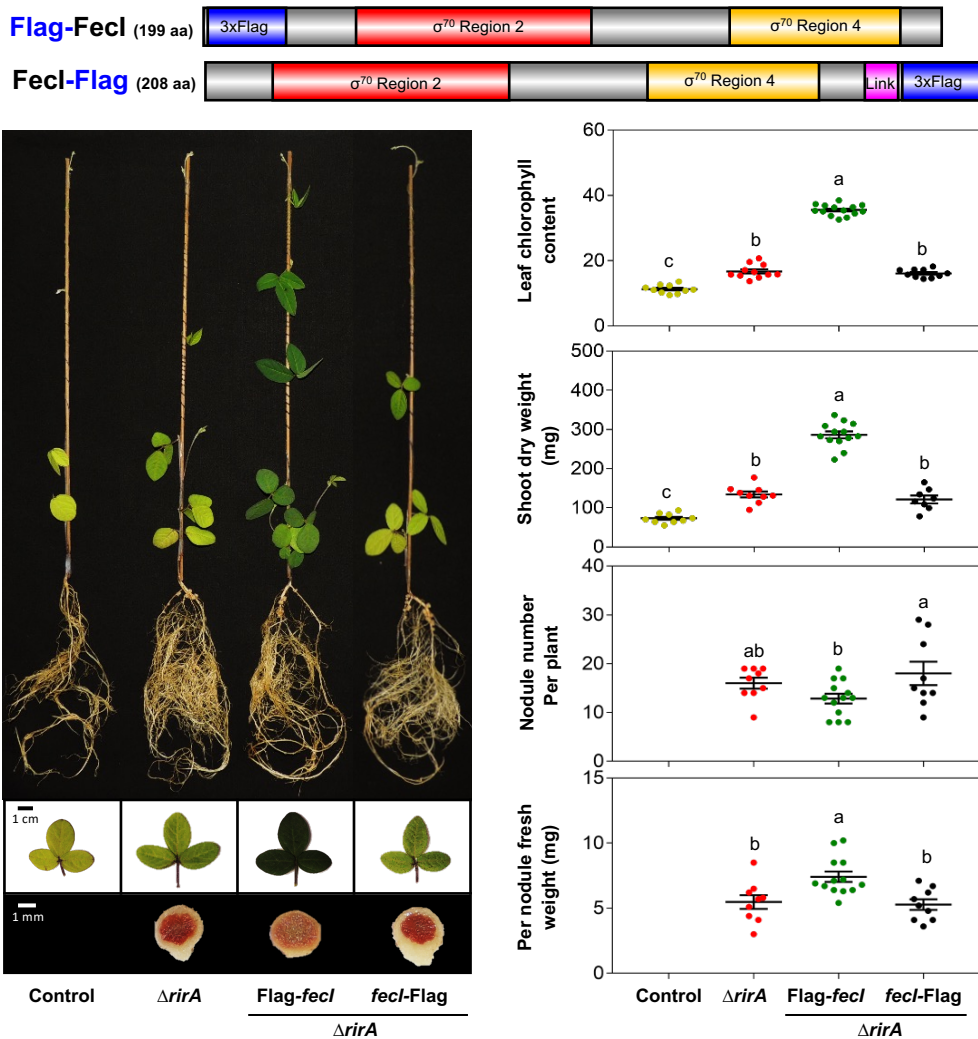

**Figure S5. Symbiotic performance of the  $\Delta rirA$  mutant carrying either the non-functional Flag-FecI or functional FecI-Flag.** Different letters indicate significant difference between means (mean  $\pm$  SE; ANOVA followed by Duncan's test, alpha = 0.05).
